# Supplementary material
Source: PubMed Central journal article supplement (PMC7751628)
Supplement: NIHMS1506407-supplement-Supplement1.pdf [file NIHMS1506407-supplement-Supplement1.pdf]

Supplement of Atmos. Chem. Phys., 18, 10433–10457, 2018  
<https://doi.org/10.5194/acp-18-10433-2018-supplement>  
© Author(s) 2018. This work is distributed under  
the Creative Commons Attribution 4.0 License.

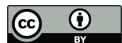

*Supplement of*

## **Observations of sesquiterpenes and their oxidation products in central Amazonia during the wet and dry seasons**

**Lindsay D. Yee et al.**

*Correspondence to:* Lindsay D. Yee ([lindsay.yee@berkeley.edu](mailto:lindsay.yee@berkeley.edu))

The copyright of individual parts of the supplement might differ from the CC BY 4.0 License.

## SI Tables

**Table S1: Custom MS Library Names referred to in Table S5 with sources of mass spectra. Experimental conditions for sesquiterpene oxidation chamber experiments provided in Table S2.**

| Custom MS Library Name | Source of MS <sup>Previous Publication</sup>                                                                                                                                                                                                                        |
|------------------------|---------------------------------------------------------------------------------------------------------------------------------------------------------------------------------------------------------------------------------------------------------------------|
| acedox                 | $\alpha$ -cedrene + O <sub>3</sub>                                                                                                                                                                                                                                  |
| acedox2                | $\alpha$ -cedrene + NO <sub>x</sub> + hv <sup>1</sup>                                                                                                                                                                                                               |
| acopox                 | $\alpha$ -copaene + O <sub>3</sub> <sup>2</sup>                                                                                                                                                                                                                     |
| ahumox                 | $\alpha$ -humulene + O <sub>3</sub>                                                                                                                                                                                                                                 |
| ahumox2                | $\alpha$ -humulene + NO <sub>x</sub> + hv <sup>1</sup>                                                                                                                                                                                                              |
| apinox                 | $\alpha$ -pinene + O <sub>3</sub> <sup>3</sup>                                                                                                                                                                                                                      |
| apinox2                | $\alpha$ -pinene + O <sub>3</sub> <sup>3</sup>                                                                                                                                                                                                                      |
| aromox                 | aromadendrene + O <sub>3</sub> <sup>2</sup>                                                                                                                                                                                                                         |
| aromox2                | aromadendrene + NO <sub>x</sub> + hv                                                                                                                                                                                                                                |
| bcpx                   | Synthesized $\beta$ -caryophyllene oxidation products <sup>4</sup> : $\beta$ -caryophyllene aldehyde, $\beta$ -nocaryophyllone aldehyde, $\beta$ -caryophyllonic acid, $\beta$ -nocaryophyllonic acid, $\beta$ -caryophyllinic acid, $\beta$ -nocaryophyllinic acid |
| bcpx2                  | $\beta$ -caryophyllene + NO <sub>x</sub> + hv <sup>2</sup>                                                                                                                                                                                                          |
| bcpx3                  | $\beta$ -caryophyllene + NO <sub>x</sub> + acidic seed + hv                                                                                                                                                                                                         |
| bfarnox                | $\beta$ -farnasene + NO <sub>x</sub> + hv <sup>2</sup>                                                                                                                                                                                                              |
| copox                  | copaiba oil + O <sub>3</sub>                                                                                                                                                                                                                                        |
| limonox                | limonene + O <sub>3</sub> <sup>3</sup>                                                                                                                                                                                                                              |
| mainlib                | NIST 14 Library                                                                                                                                                                                                                                                     |
| mane2010.hp            | proprietary library from a flavour and fragrance company (MANE)                                                                                                                                                                                                     |
| myrcox                 | myrcene + O <sub>3</sub> <sup>3</sup>                                                                                                                                                                                                                               |
| soasox/soasox2         | Previously identified compounds in filters from Southern Oxidant and Aerosol Study (SOAS) <sup>3</sup>                                                                                                                                                              |

<sup>1</sup> Jaoui, M., Kleindienst, T. E., Docherty, K. S., Lewandowski, M. and Offenberg, J. H.: Secondary organic aerosol formation from the oxidation of a series of sesquiterpenes: alpha-cedrene, beta-caryophyllene, alpha-humulene and alpha-farnesene with O-3, OH and NO3 radicals, Environ. Chem., 10(3), 178–193, doi:10.1071/en13025, 2013.

<sup>2</sup> Offenberg, J. H., Lewandowski, M., Kleindienst, T. E., Docherty, K. S., Jaoui, M., Krug, J., Riedel, T. P. and Olson, D. A.: Predicting Thermal Behavior of Secondary Organic Aerosols, Environ. Sci. Technol., 51, 9911–9919, doi:10.1021/acs.est.7b01968, 2017.

<sup>3</sup> Zhang et al., PNAS

<sup>4</sup> Be, A. G., Upshur, M. A., Liu, P., Martin, S. T., Geiger, F. M., Thomson, R. J. and Paulson, J. A.: Cloud Activation Potentials for Atmospheric  $\alpha$ -Pinene and  $\beta$ -Caryophyllene Ozonolysis Products, ACS Cent. Sci., 3(7), 715–725, doi:10.1021/acscentsci.7b00112, 2017.

**Table S2: Experimental conditions for sesquiterpene ozonolysis/photolysis experiments performed by U.S. EPA and used for making custom MS libraries as listed in Table S1.**

| Custom MS Library Name | experiment ID | temp (°C) | RH (%) | hydrocarbon (HC)                                              | initial/final [HC] (ppmC) | initial/steady-state [NO] (ppm) | initial/steady-state [O <sub>3</sub> ] (ppm) | SOA mass (µg m <sup>-3</sup> ) | OM/OC |
|------------------------|---------------|-----------|--------|---------------------------------------------------------------|---------------------------|---------------------------------|----------------------------------------------|--------------------------------|-------|
| acedox                 | ER721         | 22.3      | 31.6   | α-cedrene                                                     | 0.68/0.10                 | N/A                             | 0.203/0.166                                  | 230.5                          | 1.4   |
| acedox2                | ER649         | 23.8      | 27.9   | α-cedrene                                                     | 0.64/0.39                 | 0.108/0.059                     | 0/0.002                                      | 33.9                           | 1.4   |
| acopox                 | ER734         | 22.1      | 31.7   | α-copaene                                                     | 0.66/0.01                 | N/A                             | 0.213/0.156                                  | 271.3                          | 1.4   |
| ahumox                 | ER720         | 22.1      | 31.6   | α-humulene                                                    | 0.40/0.00                 | N/A                             | 0.186/0.061                                  | 170.8                          | 1.5   |
| ahumox2                | ER648         | 24.3      | 27.8   | α-humulene                                                    | 0.63/0.00                 | 0.093/0.028                     | 0/0.004                                      | 126.4                          | N/A   |
| aromox                 | ER742         | 22.1      | 31.5   | aromadendrene                                                 | 0.65/0.06                 | N/A                             | 0.201/0.147                                  | 87.8                           | 1.4   |
| aromox2                | ER743         | 24.7      | 31.2   | aromadendrene                                                 | 0.66/0.34                 | 0.055/0.039                     | 0/0.004                                      | 43.7                           | 1.5   |
| bcpox2                 | ER716         | 24.7      | 29.3   | β-caryophyllene                                               | 0.58/0.00                 | 0.099/0.052                     | 0/0.002                                      | 125.1                          | 1.6   |
| bcpox3                 | ER717         | 24.7      | 29.3   | β-caryophyllene                                               | 0.54/0.03                 | 0.103/0.061                     | 0/0.002                                      | 160.1                          | 1.9   |
| bfamox                 | ER711         | 24.8      | 31.1   | β-farnesene                                                   | N/A                       | 0.091/0.009                     | 0/0.025                                      | 123.6                          | 1.8   |
| copox                  | ER722         | 22.2      | 31.6   | Various in copaiba essential oil (Young Living Essential Oil) | 0.25 <sup>1</sup> /0.00   | N/A                             | 0.198/0.134                                  | 271.3                          | 1.4   |

<sup>1</sup> Estimated from sum of all major (presumably SQT) peaks measured by GC-FID. Reported value will be underestimate of actual HC in experiment, thus SOA yield likely overestimated.

5 **Table S3: Composition by percent mass of total sesquiterpenes (%  $\Sigma$ SQT) and percent contribution to total ozone reactivity (%  $\Sigma$ kO<sub>3i</sub>[SQT<sub>i</sub>]) from sesquiterpene ozonolysis at measurement site and in three commercial essential oils. Concentrations of each species estimated by using an average instrument response factor for several sesquiterpene standards unless otherwise noted that an authentic standard was used. For unidentified species, average kO<sub>3</sub> of all sesquiterpene species (from experimental determination or estimated as in Table 1) used for estimated % contribution to total ozone reactivity. BDL = Below Detection Limit, N/A = Not Applicable. Top three values for each column in bold print.**

| Sample:                     | Feb 13 2014 06:47<br>AM UTC   |                                                    | Copaiba Oil                                       |                                                    | Copaiba Oil               |                                                    | Copaiba Oil       |                                                    | Andiroiba Oil             |                                                    |
|-----------------------------|-------------------------------|----------------------------------------------------|---------------------------------------------------|----------------------------------------------------|---------------------------|----------------------------------------------------|-------------------|----------------------------------------------------|---------------------------|----------------------------------------------------|
| Location/Origin:            | T3, Manacapuru,<br>AM, Brazil |                                                    | Young Living<br>Essential Oil,<br>(origin Brazil) |                                                    | Manacapuru, AM,<br>Brazil |                                                    | Bolivia           |                                                    | Manacapuru, AM,<br>Brazil |                                                    |
| SQT                         | %<br>$\Sigma$ SQT             | % $\Sigma$ kO <sub>3i</sub><br>[SQT <sub>i</sub> ] | %<br>$\Sigma$ SQT                                 | % $\Sigma$ kO <sub>3i</sub><br>[SQT <sub>i</sub> ] | %<br>$\Sigma$ SQT         | % $\Sigma$ kO <sub>3i</sub><br>[SQT <sub>i</sub> ] | %<br>$\Sigma$ SQT | % $\Sigma$ kO <sub>3i</sub><br>[SQT <sub>i</sub> ] | %<br>$\Sigma$ SQT         | % $\Sigma$ kO <sub>3i</sub><br>[SQT <sub>i</sub> ] |
| $\alpha$ -copaene           | 2.5%                          | 0.7%                                               | 5.6%                                              | 0.1%                                               | 4.5%                      | 0.3%                                               | 4.8%              | 0.2%                                               | 6.3%                      | 0.2%                                               |
| cyperene                    | 4.6%                          | 4.0%                                               | BDL                                               | N/A                                                | BDL                       | N/A                                                | BDL               | N/A                                                | BDL                       | N/A                                                |
| $\beta$ -gurjunene          | 1.4%                          | 0.2%                                               | BDL                                               | N/A                                                | BDL                       | N/A                                                | BDL               | N/A                                                | BDL                       | N/A                                                |
| rimuene                     | 6.4%                          | 0.8%                                               | BDL                                               | N/A                                                | BDL                       | N/A                                                | BDL               | N/A                                                | BDL                       | N/A                                                |
| cis-calamene                | <b>9.2%</b>                   | <b>7.9%</b>                                        | 1.1%                                              | 0.1%                                               | 5.0%                      | 1.0%                                               | 3.3%              | 0.4%                                               | BDL                       | N/A                                                |
| $\alpha$ -cubebene          | 3.1%                          | 2.2%                                               | 2.6%                                              | 0.2%                                               | BDL                       | N/A                                                | BDL               | N/A                                                | BDL                       | N/A                                                |
| unidentified                | 1.2%                          | 1.0%                                               | BDL                                               | N/A                                                | 4.9%                      | 1.0%                                               | <b>10.9%</b>      | <b>1.3%</b>                                        | <b>14.8%</b>              | <b>1.5%</b>                                        |
| cyclosativene               | 2.2%                          | 0.3%                                               | BDL                                               | N/A                                                | BDL                       | N/A                                                | BDL               | N/A                                                | BDL                       | N/A                                                |
| $\beta$ -elemene            | 2.5%                          | 0.1%                                               | 1.1%                                              | 0.0%                                               | 2.5%                      | 0.0%                                               | 2.5%              | 0.0%                                               | BDL                       | N/A                                                |
| $\alpha$ -cedrene           | BDL                           | BDL                                                | BDL                                               | N/A                                                | 2.4%                      | 0.0%                                               | 3.5%              | 0.0%                                               | 6.4%                      | 0.0%                                               |
| unidentified                | 2.8%                          | 2.4%                                               | BDL                                               | N/A                                                | 3.9%                      | 0.8%                                               | <b>7.4%</b>       | 0.9%                                               | 7.5%                      | 0.8%                                               |
| unidentified                | 0.7%                          | 0.6%                                               | BDL                                               | N/A                                                | BDL                       | N/A                                                | BDL               | N/A                                                | BDL                       | N/A                                                |
| unidentified                | BDL                           | BDL                                                | BDL                                               | N/A                                                | 1.1%                      | 0.4%                                               | 1.8%              | 0.4%                                               | BDL                       | N/A                                                |
| $\alpha$ -patchoulene       | 2.5%                          | 0.3%                                               | BDL                                               | N/A                                                | BDL                       | N/A                                                | 0.6%              | 0.0%                                               | BDL                       | N/A                                                |
| SQT202_A                    | 0.7%                          | 0.6%                                               | BDL                                               | N/A                                                | BDL                       | N/A                                                | 1.1%              | 0.1%                                               | BDL                       | N/A                                                |
| $\gamma$ -muurolene         | 4.3%                          | 3.1%                                               | 1.8%                                              | 0.1%                                               | BDL                       | N/A                                                | BDL               | N/A                                                | BDL                       | N/A                                                |
| $\alpha$ -amorphene         | 1.1%                          | 1.6%                                               | BDL                                               | N/A                                                | BDL                       | N/A                                                | BDL               | N/A                                                | BDL                       | N/A                                                |
| $\beta$ -selinene           | 3.4%                          | 0.1%                                               | 2.0%                                              | 0.0%                                               | <b>13.8%</b>              | 0.1%                                               | 3.1%              | 0.0%                                               | 9.1%                      | 0.0%                                               |
| $\alpha$ -muurolene         | <b>9.0%</b>                   | <b>12.9%</b>                                       | BDL                                               | N/A                                                | 5.8%                      | 1.9%                                               | 0.6%              | 0.1%                                               | BDL                       | N/A                                                |
| unidentified                | 5.7%                          | 4.9%                                               | BDL                                               | N/A                                                | BDL                       | N/A                                                | BDL               | N/A                                                | BDL                       | N/A                                                |
| $\beta$ -bisabolene         | 2.9%                          | 4.2%                                               | BDL                                               | N/A                                                | <b>16.3%</b>              | <b>5.5%</b>                                        | 5.0%              | 1.0%                                               | BDL                       | N/A                                                |
| $\gamma$ -cadinene          | 3.4%                          | 2.5%                                               | 1.7%                                              | 0.1%                                               | 5.7%                      | 1.0%                                               | 3.0%              | 0.3%                                               | BDL                       | N/A                                                |
| $\delta$ -cadinene          | <b>13.2%</b>                  | <b>35.7%</b>                                       | <b>8.1%</b>                                       | <b>1.9%</b>                                        | 2.0%                      | 1.2%                                               | 1.1%              | 0.4%                                               | BDL                       | N/A                                                |
| selinene <7-epi- $\alpha$ > | 2.6%                          | 7.0%                                               | 1.3%                                              | 0.3%                                               | BDL                       | N/A                                                | BDL               | N/A                                                | BDL                       | N/A                                                |
| $\gamma$ -cuprenene         | 0.6%                          | 0.5%                                               | BDL                                               | N/A                                                | BDL                       | N/A                                                | 0.6%              | 0.1%                                               | BDL                       | N/A                                                |
| $\alpha$ -cadinene          | 0.5%                          | 0.8%                                               | 0.6%                                              | 0.1%                                               | 0.7%                      | 0.2%                                               | 0.7%              | 0.1%                                               | BDL                       | N/A                                                |
| unidentified                | BDL                           | BDL                                                | 0.6%                                              | 0.0%                                               | BDL                       | N/A                                                | 0.7%              | 0.1%                                               | BDL                       | N/A                                                |
| selina-3,7(11)-diene        | 0.7%                          | 1.9%                                               | BDL                                               | N/A                                                | BDL                       | N/A                                                | BDL               | N/A                                                | BDL                       | N/A                                                |
| pimaradiene                 | 0.6%                          | 0.1%                                               | BDL                                               | N/A                                                | BDL                       | N/A                                                | BDL               | N/A                                                | BDL                       | N/A                                                |
| sandaracopimaradiene        | 5.5%                          | 0.7%                                               | BDL                                               | N/A                                                | BDL                       | N/A                                                | BDL               | N/A                                                | BDL                       | N/A                                                |
| kaurene                     | 2.1%                          | 0.0%                                               | BDL                                               | N/A                                                | BDL                       | N/A                                                | BDL               | N/A                                                | BDL                       | N/A                                                |
| SQT202_B                    | 1.3%                          | 1.2%                                               | 0.6%                                              | 0.0%                                               | 1.7%                      | 0.3%                                               | 2.3%              | 0.3%                                               | BDL                       | N/A                                                |
| SQT202_C/cuparene           | 0.7%                          | 0.6%                                               | BDL                                               | N/A                                                | BDL                       | N/A                                                | BDL               | N/A                                                | BDL                       | N/A                                                |
| isocaryophyllene            | BDL                           | N/A                                                | 2.6%                                              | 0.2%                                               | 6.2%                      | 1.1%                                               | 7.3%              | 0.7%                                               | <b>10.9%</b>              | <b>1.0%</b>                                        |
| $\beta$ -caryophyllene      | BDL                           | N/A                                                | <b>56.2%</b>                                      | <b>95.0%</b>                                       | <b>17.8%</b>              | <b>80.2%</b>                                       | <b>32.9%</b>      | <b>88.2%</b>                                       | <b>41.5%</b>              | <b>95.9%</b>                                       |

|                              |      |      |             |             |      |             |      |             |      |      |
|------------------------------|------|------|-------------|-------------|------|-------------|------|-------------|------|------|
| trans- $\alpha$ -bergamotene | BDL  | N/A  | 1.0%        | 0.1%        | 1.0% | 0.3%        | 4.3% | 0.9%        | 3.5% | 0.6% |
| $\alpha$ -humulene           | BDL  | N/A  | 0.7%        | <b>1.1%</b> | 0.7% | <b>3.3%</b> | 1.6% | <b>4.3%</b> | BDL  | N/A  |
| (-) alloaromadendrene        | 1.4% | 0.0% | <b>5.9%</b> | 0.0%        | BDL  | N/A         | BDL  | N/A         | BDL  | N/A  |
| unidentified                 | BDL  | N/A  | 1.2%        | 0.1%        | BDL  | N/A         | BDL  | N/A         | BDL  | N/A  |
| unidentified                 | BDL  | N/A  | BDL         | N/A         | BDL  | N/A         | BDL  | N/A         | BDL  | N/A  |
| $\beta$ -bisabolene          | BDL  | N/A  | 0.8%        | 0.1%        | 3.9% | 1.3%        | 0.7% | 0.1%        | BDL  | N/A  |
| $\alpha$ -selinene           | BDL  | N/A  | 3.0%        | 0.2%        | BDL  | N/A         | BDL  | N/A         | BDL  | N/A  |
| valencene-<br>eremophilene   | BDL  | N/A  | BDL         | N/A         | BDL  | N/A         | BDL  | N/A         | BDL  | N/A  |
| (+) longifolene              | BDL  | N/A  | BDL         | N/A         | BDL  | N/A         | BDL  | N/A         | BDL  | N/A  |

**Table S4: Comparison of % contribution of three sesquiterpenes:  $\beta$ -caryophyllene,  $\alpha$ -copaene, and  $\beta$ -elemene to total sesquiterpenes in ambient air, essential oils, and tissue of Amazonian trees. Major component of sesquiterpene compounds also listed for reference. References listed as footnotes.**

| Analyte <sup>Ref.</sup>                                                         | Relative abundance raw integrated area basis |                     |                    |                        | Relative abundance mass quantified basis |                     |                    |                        |
|---------------------------------------------------------------------------------|----------------------------------------------|---------------------|--------------------|------------------------|------------------------------------------|---------------------|--------------------|------------------------|
|                                                                                 | % $\beta$ -caryophyllene                     | % $\alpha$ -copaene | % $\beta$ -elemene | Major component        | % $\beta$ -caryophyllene                 | % $\alpha$ -copaene | % $\beta$ -elemene | Major component        |
| Ambient air, T3, 13 Feb 2014 06:47 AM UTC <sup>1</sup>                          | BDL                                          | 12.6                | 2.5                | $\delta$ -cadinene     | BDL                                      | 2.5                 | 2.5                | $\delta$ -cadinene     |
| Copaiba oil, Manacapuru, Brazil <sup>1</sup>                                    | 6.9                                          | 17.5                | 1.9                | $\alpha$ -copaene      | 17.8                                     | 4.5                 | 2.5                | $\beta$ -caryophyllene |
| Copaiba oil, Bolivia <sup>1</sup>                                               | 12.4                                         | 18.3                | 1.9                | $\alpha$ -copaene      | 32.9                                     | 4.8                 | 2.5                | $\beta$ -caryophyllene |
| Andiroba oil, Manacapuru Brazil <sup>1</sup>                                    | 13.7                                         | 20.8                | BDL                | $\alpha$ -cedrene      | 41.5                                     | 6.3                 | BDL                | $\beta$ -caryophyllene |
| Copaiba oil, Brazil, Young Living Essential Oils <sup>1</sup>                   | 30.0                                         | 30.0                | 1.0                | $\alpha$ -copaene      | 52.5                                     | 5.3                 | 1                  | $\beta$ -caryophyllene |
| Copaifera officinalis, three-week old seedlings (leaves) <sup>2</sup>           | N/A                                          | N/A                 | N/A                | N/A                    | 5.8                                      | 0.5                 | 0.3                | Germacrene D           |
| Copaifera officinalis, three-week old seedlings (stems) <sup>2</sup>            | N/A                                          | N/A                 | N/A                | N/A                    | 15.1                                     | 0.5                 | 0.4                | Germacrene D           |
| Copaifera officinalis, three-week old seedlings (roots) <sup>2</sup>            | N/A                                          | N/A                 | N/A                | N/A                    | 82.6                                     | BDL                 | ND                 | $\beta$ -caryophyllene |
| Copaifera officinalis, two-year old trees (leaves) <sup>2</sup>                 | N/A                                          | N/A                 | N/A                | N/A                    | 12                                       | 1.1                 | 1                  | Germacrene D           |
| Copaifera officinalis, two-year old trees (stems) <sup>2</sup>                  | N/A                                          | N/A                 | N/A                | N/A                    | 18                                       | 1                   | 0.5                | Germacrene D           |
| Copaifera officinalis, two-year old trees (roots) <sup>2</sup>                  | N/A                                          | N/A                 | N/A                | N/A                    | 67.7                                     | 1.7                 | 3.9                | $\beta$ -caryophyllene |
| Copaifera officinalis, three-week old seedlings injured, emissions <sup>2</sup> | N/A                                          | N/A                 | N/A                | N/A                    | 21.6                                     | 1.2                 | 1.9                | Germacrene D           |
| Rosewood oil, <i>Aniba rosaedora</i> Ducke <sup>3</sup>                         | 3.4                                          | 16.3                | 6.3                | $\alpha$ -copaene      | N/A                                      | N/A                 | N/A                | N/A                    |
| C1 Commercial copaiba oil, Tarauacá, Acre state, Brazil <sup>4</sup>            | 56.3                                         | 2.0                 | 1.0                | $\beta$ -caryophyllene | N/A                                      | N/A                 | N/A                | N/A                    |
| C2 Commercial copaiba oil,                                                      | 26.5                                         | N/A                 | N/A                | $\beta$ -caryophyllene | N/A                                      | N/A                 | N/A                | N/A                    |

<sup>1</sup> This study

<sup>2</sup> Chen et al., 2009

<sup>3</sup> Fidelis et al., 2011

<sup>4</sup> Soares et al., 2013

| Analyte <sup>Ref.</sup>                                                                                           | Relative abundance raw integrated area basis |                     |                    |                        | Relative abundance mass quantified basis |                     |                    |                 |
|-------------------------------------------------------------------------------------------------------------------|----------------------------------------------|---------------------|--------------------|------------------------|------------------------------------------|---------------------|--------------------|-----------------|
|                                                                                                                   | % $\beta$ -caryophyllene                     | % $\alpha$ -copaene | % $\beta$ -elemene | Major component        | % $\beta$ -caryophyllene                 | % $\alpha$ -copaene | % $\beta$ -elemene | Major component |
| Tarauacá, Acre state, Brazil <sup>4</sup>                                                                         |                                              |                     |                    |                        |                                          |                     |                    |                 |
| C3 Commercial copaiba oil, Tarauacá, Acre state, Brazil <sup>4</sup>                                              | 9.9                                          | 32.6                | 4.3                | $\alpha$ -copaene      | N/A                                      | N/A                 | N/A                | N/A             |
| C4-VF (volatile fraction, sesquiterpenes only content of C4 copaiba oil), Baía do Portel, PA, Brazil <sup>4</sup> | 42.4                                         | 11.2                | 2.0                | $\beta$ -caryophyllene | N/A                                      | N/A                 | N/A                | N/A             |
| <b>Mean</b>                                                                                                       | <b>22.4</b>                                  | <b>17.9</b>         | <b>2.6</b>         |                        | <b>33.4</b>                              | <b>2.7</b>          | <b>1.7</b>         |                 |
| <b>Standard Deviation</b>                                                                                         | 17.9                                         | 9.4                 | 1.8                |                        | 24.9                                     | 2.1                 | 1.2                |                 |
| <b>Median</b>                                                                                                     | 13.7                                         | 17.5                | 2.0                |                        | 21.6                                     | 1.7                 | 1.5                |                 |

**Table S5: Peaks attributed to BVOC oxidation products in shown in GCxGC chromatogram of main text (Figure 9). Best MS matches shown. Library names and source of MS are listed in Table S1.**

| Compound Name/Description              | d-alkane LRI_I | d-alkane Library LRI_I | Best Match Library_Name | Library Match_Factor | Library_Reverse Match_Factor | RTI_min | RTII_sec | Assigned Source Category |
|----------------------------------------|----------------|------------------------|-------------------------|----------------------|------------------------------|---------|----------|--------------------------|
| ISOP 2-methyltetrol_1                  | 1574           | 1572                   | soasox                  | 943                  | 944                          | 37.53   | 0.65     | ISOPOX                   |
| ISOP isoprene SOA 1, Surratt 2006      | 1475           | 1475                   | soasox                  | 921                  | 921                          | 34.09   | 0.79     | ISOPOX                   |
| ISOP 2-methyltetrol_2                  | 1555           | 1554                   | soasox                  | 895                  | 895                          | 36.86   | 0.64     | ISOPOX                   |
| ISOP isoprene SOA 2, Surratt 2006      | 1490           | 1489                   | soasox                  | 888                  | 890                          | 34.60   | 0.82     | ISOPOX                   |
| ISOP C5alkenetriol 1                   | 1413           | 1413                   | soasox                  | 859                  | 868                          | 31.94   | 0.61     | ISOPOX                   |
| ISOP C5alkenetriol 2                   | 1407           | 1406                   | soasox                  | 786                  | 806                          | 31.70   | 0.64     | ISOPOX                   |
|                                        | 1525           | 1523                   | limonox                 | 855                  | 856                          | 35.81   | 0.74     | MTOX                     |
| MT 2-hydroxyglutaric acid              | 1598           | 1597                   | soasox                  | 897                  | 898                          | 38.35   | 0.98     | MTOX                     |
| MT MBTCA                               | 1776           | 1778                   | soasox                  | 893                  | 894                          | 43.97   | 1.09     | MTOX                     |
|                                        | 1615           | 1611                   | myrcox                  | 815                  | 818                          | 38.89   | 1.26     | MTOX                     |
| MT MBTCA isomer                        | 1852           | 1853                   | soasox                  | 803                  | 810                          | 46.20   | 1.14     | MTOX                     |
|                                        | 1680           | 1679                   | copox                   | 821                  | 828                          | 40.93   | 1.13     | MTOX                     |
| MT pinic acid                          | 1693           | 1693                   | soasox                  | 778                  | 796                          | 41.35   | 1.09     | MTOX                     |
| MT cis-norpinic acid                   | 1630           | 1632                   | soasox2                 | 833                  | 840                          | 39.36   | 1.98     | MTOX                     |
| MT 3-hydroxyglutaric acid              | 1602           | 1602                   | soasox                  | 774                  | 785                          | 38.50   | 1.00     | MTOX                     |
| MT 3-hydroxy-4,4-dimethylglutaric acid | 1637           | 1636                   | soasox                  | 818                  | 823                          | 39.60   | 0.92     | MTOX                     |
| MT Tricarballic acid                   | 1757           | -1                     | mainlib                 | 704                  | 731                          | 43.35   | 1.16     | MTOX                     |
|                                        | 1372           | 1335                   | myrcox                  | 800                  | 804                          | 30.38   | 1.11     | MTOX                     |
| MT 2,3-dihydroxy-4-oxo pentanoic acid  | 1533           | 1532                   | soasox                  | 684                  | 709                          | 36.08   | 1.17     | MTOX                     |
|                                        | 1653           | 1653                   | copox                   | 914                  | 914                          | 40.10   | 1.35     | SQTOX                    |
| $\beta$ -caryophyllene aldehyde, TMS   | 1714           | 1714                   | bcpx2                   | 899                  | 900                          | 42.02   | 2.21     | SQTOX                    |
|                                        | 1763           | 1764                   | soasox                  | 891                  | 892                          | 43.54   | 1.06     | SQTOX                    |
|                                        | 1678           | 1677                   | copox                   | 883                  | 885                          | 40.89   | 0.76     | SQTOX                    |
|                                        | 1870           | 1870                   | ahumox2                 | 882                  | 883                          | 46.71   | 0.71     | SQTOX                    |
|                                        | 1744           | 1746                   | soasox2                 | 867                  | 870                          | 42.96   | 1.58     | SQTOX                    |
| $\beta$ -nocaryophyllone aldehyde      | 1754           | 1757                   | soasox                  | 861                  | 864                          | 43.27   | 0.49     | SQTOX                    |
|                                        | 1582           | 1581                   | bcpx2                   | 836                  | 847                          | 37.80   | 1.18     | SQTOX                    |
|                                        | 1843           | 1850                   | bcpx3                   | 681                  | 687                          | 45.93   | 1.14     | SQTOX                    |
| $\alpha$ -copaene oxidation product    | 1719           | 1722                   | acopox                  | 844                  | 848                          | 42.18   | 1.88     | SQTOX                    |
|                                        | 2002           | 2001                   | copox                   | 794                  | 802                          | 50.42   | 1.07     | SQTOX                    |
|                                        | 1790           | 1791                   | soasox                  | 799                  | 817                          | 44.40   | 1.05     | SQTOX                    |
|                                        | 1754           | 1753                   | aromox2                 | 815                  | 826                          | 43.27   | 0.98     | SQTOX                    |



| Compound Name/Description           | d-alkane LRI_I | d-alkane Library LRI_I | Best Match Library_Name | Library Match_Factor | Library Reverse Match_Factor | RTI_min | RTII_sec | Assigned Source Category |
|-------------------------------------|----------------|------------------------|-------------------------|----------------------|------------------------------|---------|----------|--------------------------|
|                                     | 2052.63        | 2053                   | copox                   | 702                  | 702                          | 51.75   | 1.05     | SQTOX                    |
|                                     | 1824.83        | 1824                   | ahumox2                 | 813                  | 817                          | 45.42   | 0.66     | SQTOX                    |
|                                     | 1983.45        | 1985                   | bcpox2                  | 761                  | 773                          | 49.91   | 1.06     | SQTOX                    |
|                                     | 1600           | -1                     | mainlib                 | 779                  | 832                          | 38.42   | 0.97     | SQTOX                    |
|                                     | 1842.76        | 1844                   | acopox                  | 767                  | 773                          | 45.93   | 1.05     | SQTOX                    |
|                                     | 1797.52        | 1798                   | bcpox2                  | 788                  | 799                          | 44.64   | 1.78     | SQTOX                    |
|                                     | 2007.52        | 2005                   | bcpox3                  | 794                  | 820                          | 50.58   | 0.64     | SQTOX                    |
|                                     | 1726.71        | 1727                   | bcpox3                  | 785                  | 795                          | 42.41   | 1.56     | SQTOX                    |
|                                     | 1791.3         | -1                     | mane2010.hp             | 651                  | 667                          | 44.44   | 1.62     | SQTOX                    |
|                                     | 1875.86        | 1876                   | bfarnox                 | 560                  | 604                          | 46.86   | 0.94     | SQTOX                    |
|                                     | 1767.7         | 1768                   | ahumox                  | 754                  | 761                          | 43.70   | 0.89     | SQTOX                    |
|                                     | 1826.21        | 1821                   | soasox2                 | 688                  | 698                          | 45.46   | 1.17     | SQTOX                    |
|                                     | 1827.59        | 1838                   | bcpox2                  | 626                  | 647                          | 45.50   | 1.22     | SQTOX                    |
|                                     | 1846.9         | 1847                   | ahumox2                 | 615                  | 628                          | 46.04   | 0.96     | SQTOX                    |
|                                     | 1856.55        | 1855                   | bfarnox                 | 656                  | 673                          | 46.32   | 1.20     | SQTOX                    |
| $\beta$ -nocaryophyllonic acid, TMS | 1984.83        | -1                     | bcpox                   | 698                  | 714                          | 49.95   | 1.87     | SQTOX                    |
|                                     | 1862.07        | 1872                   | acedox2                 | 592                  | 595                          | 46.47   | 1.13     | SQTOX                    |
|                                     | 1871.72        | 1872                   | aromox2                 | 613                  | 635                          | 46.75   | 1.36     | SQTOX                    |
|                                     | 1920           | 1919                   | ahumox                  | 779                  | 809                          | 48.11   | 0.64     | SQTOX                    |
|                                     | 1800           | 1800                   | ahumox                  | 561                  | 616                          | 44.71   | 0.88     | SQTOX                    |
|                                     | 1831.72        | 1828                   | acopox                  | 568                  | 585                          | 45.61   | 0.86     | SQTOX                    |
|                                     | 1808.28        | 1808                   | bcpox2                  | 617                  | 639                          | 44.95   | 1.23     | SQTOX                    |
|                                     | 1863.45        | 1864                   | soasox2                 | 662                  | 676                          | 46.51   | 1.34     | SQTOX                    |
|                                     | 2021.05        | 2020                   | bcpox2                  | 655                  | 683                          | 50.93   | 1.09     | SQTOX                    |
|                                     | 2028.57        | 2029                   | copox                   | 658                  | 664                          | 51.12   | 1.08     | SQTOX                    |
|                                     | 1878.62        | 1879                   | acedox                  | 548                  | 557                          | 46.94   | 1.18     | SQTOX                    |
| $\beta$ -caryophyllonic acid, TMS   | 1931.03        | 1932                   | bcpox                   | 663                  | 692                          | 48.43   | 1.43     | SQTOX                    |
|                                     | 2061.65        | 2063                   | bcpox2                  | 562                  | 582                          | 51.98   | 1.06     | SQTOX                    |
|                                     | 1877.24        | 1879                   | soasox                  | 890                  | 890                          | 46.90   | 0.74     | TERPOX                   |
|                                     | 1633.54        | 1633                   | ahumox                  | 882                  | 883                          | 39.48   | 1.57     | TERPOX                   |
|                                     | 1786.34        | 1786                   | copox                   | 891                  | 894                          | 44.28   | 0.75     | TERPOX                   |
|                                     | 1479.78        | 1479                   | soasox2                 | 870                  | 873                          | 34.24   | 1.31     | TERPOX                   |

| <b>Compound Name/Description</b> | <b>d-alkane LRI I</b> | <b>d-alkane Library LRI I</b> | <b>Best Match Library_Name</b> | <b>Library Match_Factor</b> | <b>Library_Reverse Match_Factor</b> | <b>RTI_min</b> | <b>RTII_sec</b> | <b>Assigned Source Category</b> |
|----------------------------------|-----------------------|-------------------------------|--------------------------------|-----------------------------|-------------------------------------|----------------|-----------------|---------------------------------|
|                                  | 1513.48               | 1510                          | apinox                         | 793                         | 804                                 | 35.42          | 1.65            | TERPOX                          |
|                                  | 1603.73               | 1602                          | soasox2                        | 799                         | 808                                 | 38.54          | 0.73            | TERPOX                          |
|                                  | 1680.75               | 1682                          | soasox                         | 820                         | 829                                 | 40.96          | 2.30            | TERPOX                          |
|                                  | 1503.37               | 1504                          | soasox                         | 805                         | 812                                 | 35.06          | 0.73            | TERPOX                          |
|                                  | 1503.37               | 1504                          | soasox                         | 825                         | 835                                 | 35.06          | 0.70            | TERPOX                          |
|                                  | 1561.8                | 1538                          | mainlib                        | 669                         | 900                                 | 37.10          | 1.22            | TERPOX                          |

SI Figures

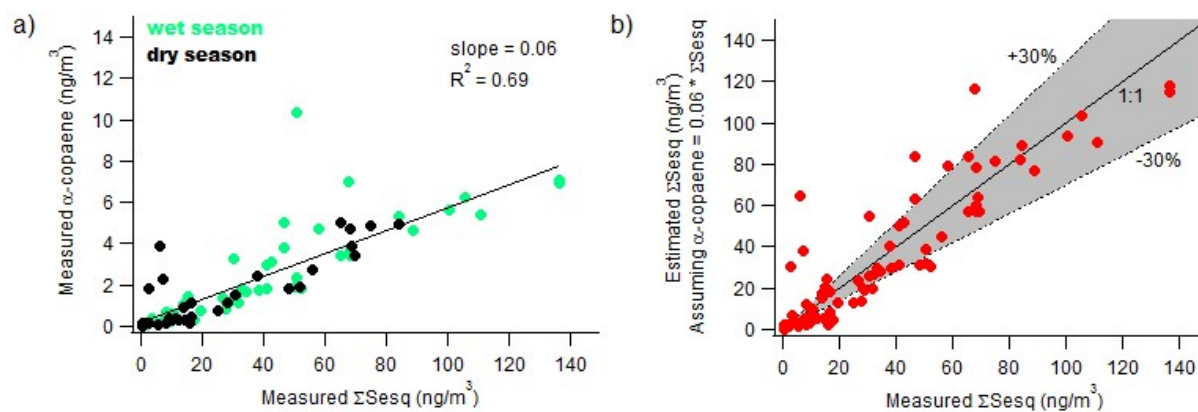

Figure S1: During underivatized runs (n=79),  $\alpha$ -copaene on average accounts for 6% of total observed sesquiterpenes in panel a) within +/- 30% in panel b).

5

**Total VOC Concentration**

**Total Ozone Reactivity**

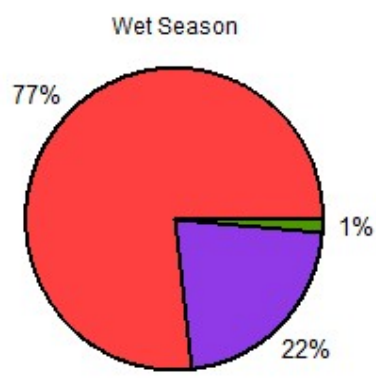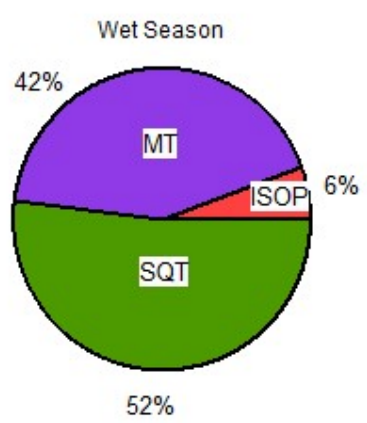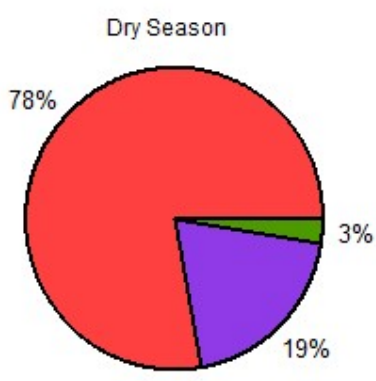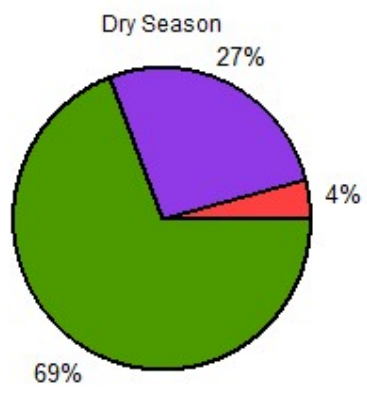

5 **Figure S2: Average percentage of isoprene (ISOP, red), monoterpenes (MT, purple), and sesquiterpenes (SQT, green) during wet and dry seasons contributing to their summed VOC concentration and total ozone reactivity for chemical composition within/near the canopy. VOC concentrations are based on measurements from Alves et al., (2016) and ozone reactivity calculated using monoterpene composition according to Jardine et al., (2015) and sesquiterpene composition according to copaiba essential oil (source: Young Living) analysed in this study.**

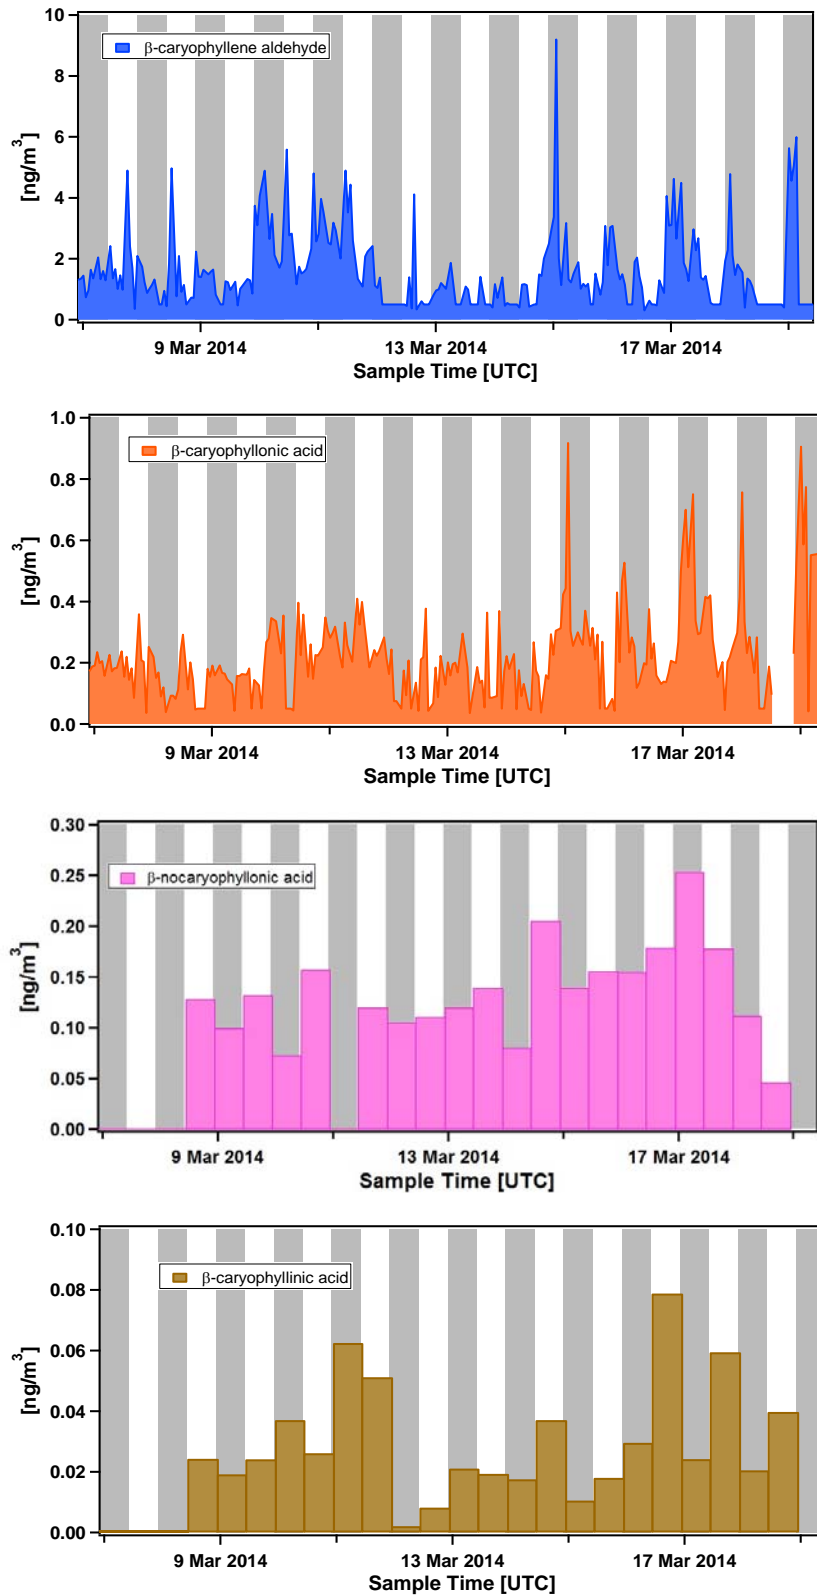

5

Figure S3: Selected timeline of gas-phase tracers ( $\beta$ -caryophyllene aldehyde,  $\beta$ -caryophyllonic acid) measured with SV-TAG and particle-phase tracers ( $\beta$ -nocaryophyllonic acid,  $\beta$ -caryophyllinic acid) from  $\beta$ -caryophyllene oxidation.
